# Supplementary material for: Design and Validation of Nanofibers Made of Self-Assembled Peptides to Become Multifunctional Stimuli-Sensitive Nanovectors of Anticancer Drug Doxorubicin
Source: MDPI journal article supplement (doi:10.3390/pharmaceutics14081544), 2022-07-25
Supplement: s1 [file s1]

# Design and Validation of Nanofibers Made of Self-Assembled Peptides to Become Multifunctional Stimuli-Sensitive Nanovectors of Anticancer Drug Doxorubicin

Valentina Del Genio <sup>1,2</sup>, Annarita Falanga <sup>3</sup>, Emilie Allard-Vannier <sup>2</sup>, Katel Hervé-Aubert <sup>2</sup>, Marilisa Leone<sup>4</sup>, Rosa Bellavita <sup>1</sup>, Rustem Uzbekov <sup>5</sup>, Igor Chourpa <sup>2,\*</sup>, Stefania Galdiero <sup>1,\*</sup>

<sup>1</sup> Department of Pharmacy, School of Medicine, University of Naples 'Federico II', Via Domenico Montesano 49, 80131 Naples, Italy; valentina.delgenio@unina.it (V.D.G.); rosa.bellavita@unina.it (R.B.)

<sup>2</sup> EA 6295 Nanomédicaments et Nanosondes, Faculté de Pharmacie, Université de Tours, 31 Avenue Monge, 37200 Tours, France; emilie.allard@univ-tours.fr (E.A.-V.); katel.herve@univ-tours.fr (K.H.-A.)

<sup>3</sup> Department of Agricultural Science, University of Naples 'Federico II', Via Università 100, 80055 Portici, Italy; annarita.falanga@unina.it

<sup>4</sup> Institute of Biostructures and Bioimaging-CNR, 80145 Naples, Italy; marilisa.leone@cnr.it

<sup>5</sup> Plateforme Scientifique et Technique "Analyse des Systèmes Biologiques" (PST ASB), UFR de Médecine, 37032 Tours, France; rustem.uzbekov@univ-tours.fr

<sup>6</sup> Faculty of Bioengineering and Bioinformatics, Moscow State University, 119992, Moscow, Russia

\* Correspondence: igor.chourpa@univ-tours.fr (I.C.); stefania.galdiero@unina.it (S.G.); Tel.: +39-081-2534503 (S.G.)

## Table of contents

HPLC chromatograms and analytical data of peptides **P1, P2, P3**

S2-S3

---

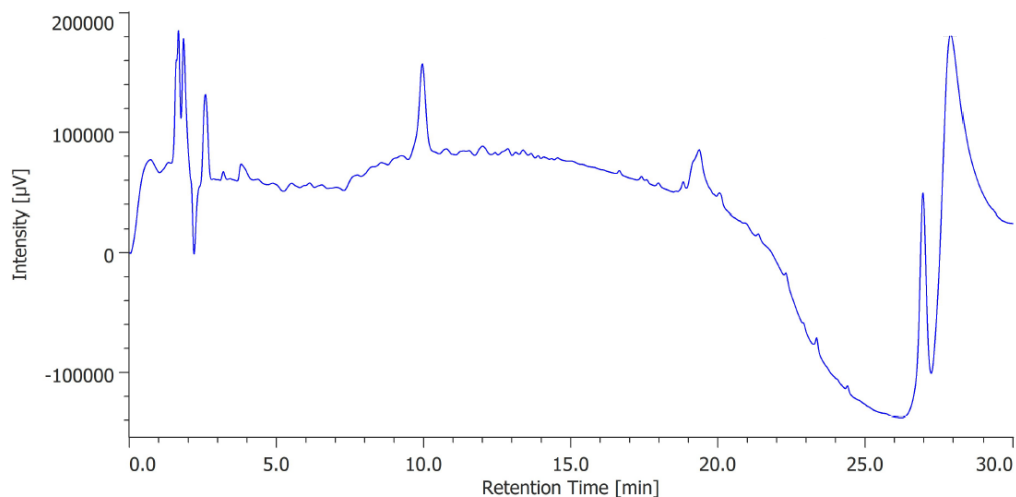

**Figure S1.** Chromatogram of peptide **P1** obtained by an analytical HPLC (Jasco LC-NetII/ADC) equipped with a Phenomenex Kinetex C18 column (150 mm × 4.6 mm, 5 μm, 100 Å), and monitored by UV detection at 220 nm.  $t_R$ : 9.955 min [linear gradient 20-80% MeCN (0.1% TFA) in H<sub>2</sub>O (0.1% TFA) over 20 min, flow rate of 1 mL/min]. Calculated mass:1225.7, Found mass:  $[M+H]^+=1226.8$

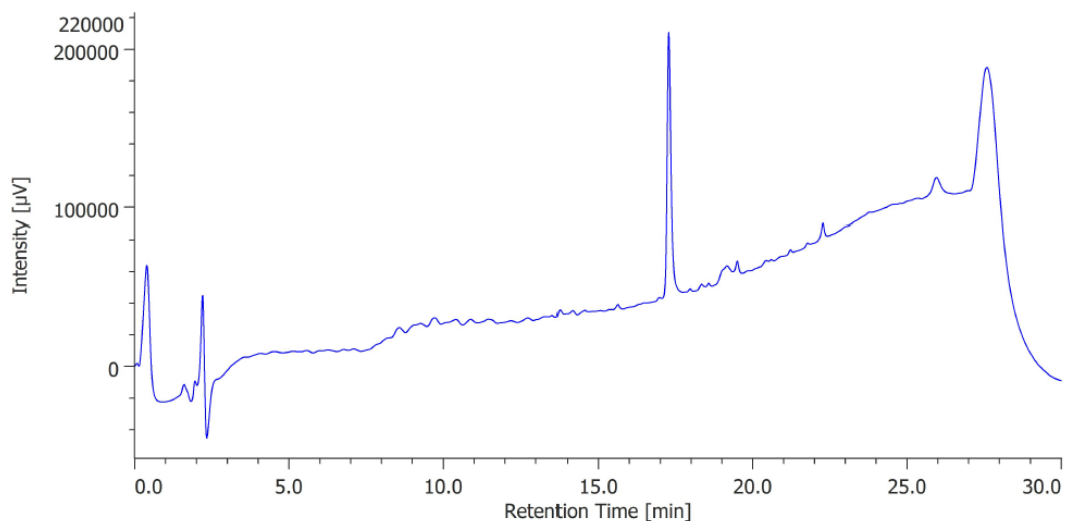

**Figure S2.** Chromatogram of peptide **P2** obtained by an analytical HPLC (Jasco LC-NetII/ADC) equipped with a Phenomenex Kinetex C18 column (150 mm × 4.6 mm, 5 μm, 100 Å), and monitored by UV detection at 220 nm.  $t_R$ : 17.272 min [linear gradient 10-90% MeCN (0.1% TFA) in H<sub>2</sub>O (0.1% TFA) over 20 min, flow rate of 1 mL/min]. Calculated mass:1279.9, Found mass:  $[M+2H]^+/2=640.9$ .

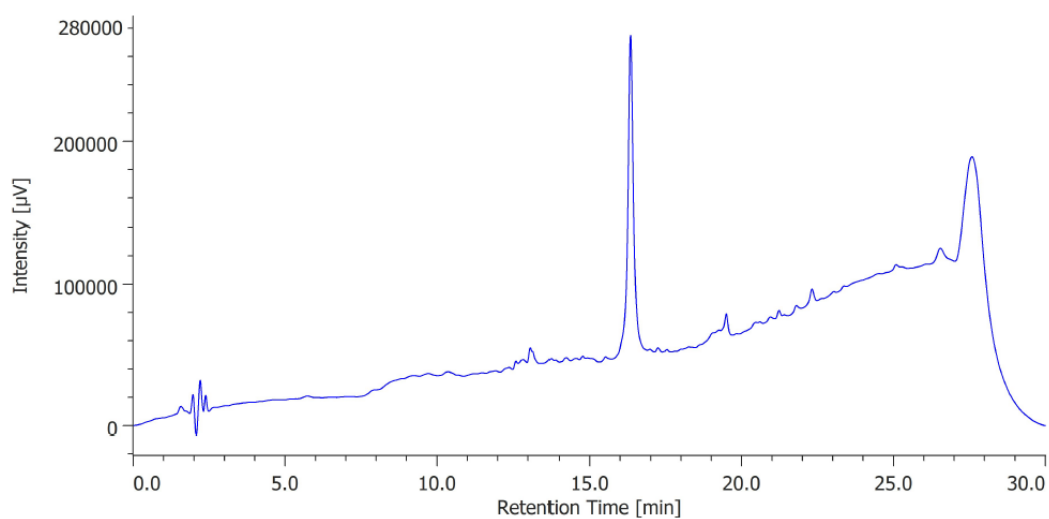

**Figure S3.** Chromatogram of peptide **P3** obtained by an analytical HPLC (Jasco LC-NetII/ADC) equipped with a Phenomenex Kinetex C18 column (150 mm  $\times$  4.6 mm, 5  $\mu\text{m}$ , 100  $\text{\AA}$ ), and monitored by UV detection at 220 nm.  $t_{\text{R}}$ : 16.338 min [linear gradient 10-90% MeCN (0.1% TFA) in H<sub>2</sub>O (0.1% TFA) over 20 min, flow rate of 1 mL/min]. Calculated mass: 3559.1, Found mass: [M+3H]<sup>3+</sup> 1188.2, [M+4H]<sup>4+</sup> 891.5, [M+5H]<sup>5+</sup> 713.4.
